# Supplementary material
Source: Springer Nature journal article supplement (https://www.springermedizin.de/resource/supplementary/12878_2014_29_MOESM1_ESM.pdf/9686378)
Supplement: MOESM1 [file 9686378]

**Lymphoma**  
n=35  
11/24/0  
(Hickman/ Port/ no CVC)

**Leukemia**  
n= 81  
28/51/2  
(Hickman/ Port/ no CVC)

**Solid tumor**  
n=116  
9/63/44  
(Hickman/ Port/ no CVC)

**CNS tumor**  
n=168  
9/59/100  
(Hickman/ Port/ no CVC)

**Others**  
n=48  
11/4/33  
(Hickman/ Port/ no CVC)

**Total n=448**  
**CVC n = 269**

**with  
Thrombosis**  
n=55

**without  
Thrombosis**  
n=393

**CVC-associated**  
n=43

**not CVC-associated**  
n=12

**Lymphoma**  
n=6

**Leukemia**  
n=17

**Solid tumor**  
n=3

**CNS tumor**  
n=12

**Others**  
n=5
